# Supplementary material for: Sensitivity investigation of a biosensor with resonant coupling of propagating surface plasmons to localized surface plasmons in the near infrared region
Source: Royal Society of Chemistry journal article supplement (doi:10.1039/d3nr01076g), 2023-01-01
Supplement: d3nr01076g6.pdf [file d3nr01076g6.pdf]

## Supporting Information

### Sensitivity investigation of resonant coupling biosensor of surface propagating plasmons to localized surface plasmons in near infrared region

Huimin Wang, Tao Wang\*, Simei Zhong, Jinyan Zhang, Ruoqin Yan, Peng Xu, Yu-hui Zhang, Xinzhao Yue, Lu Wang, Yuandong Wang, Xuyang Yuan, Jian Wang\*, and Jinwei Zeng

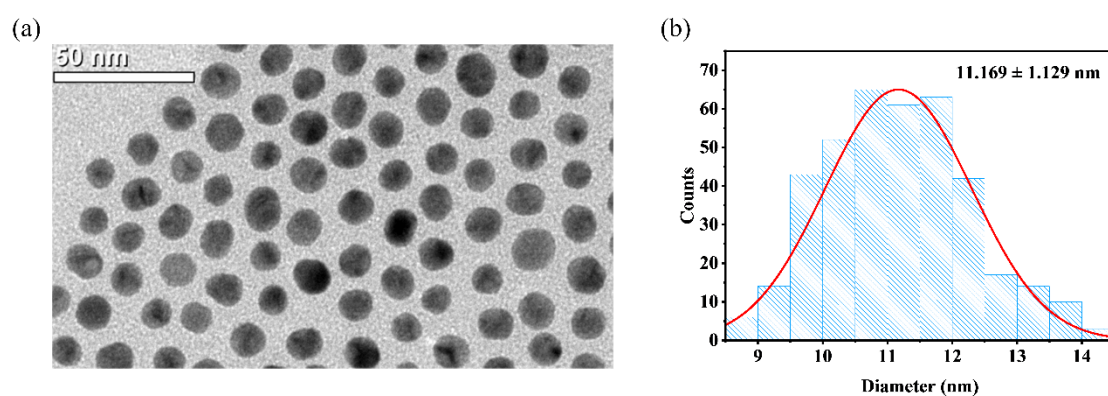

Figure S1 (a) TEM image and (b) size distribution histogram of AuNPs.

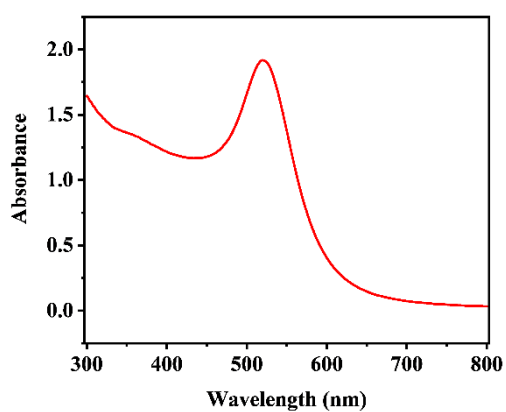

Figure S2 UV-VIS spectrum of AuNPs solution.

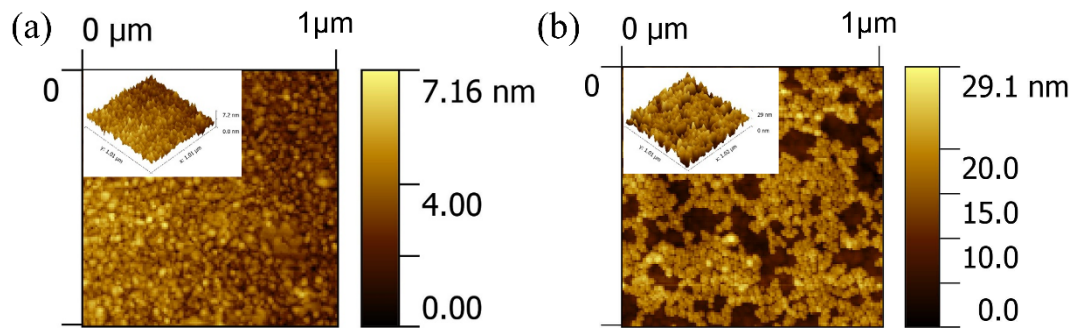

Figure S3 Two-dimensional AFM images of (a) GF and (b) GF-AuNP. Insets are three-dimensional AFM images of (a) GF and (b) GF-AuNP.

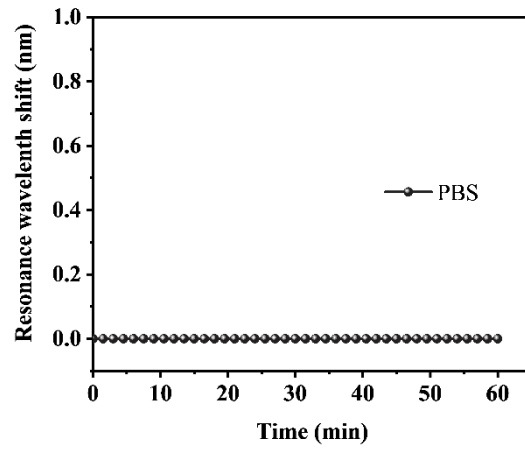

Figure S4 Stability testing of the sensing system.
