# Supplementary figures and images for: Sensitivity investigation of a biosensor with resonant coupling of propagating surface plasmons to localized surface plasmons in the near infrared region
Source: Royal Society of Chemistry journal article supplement (doi:10.1039/d3nr01076g), 2023-01-01

(a)

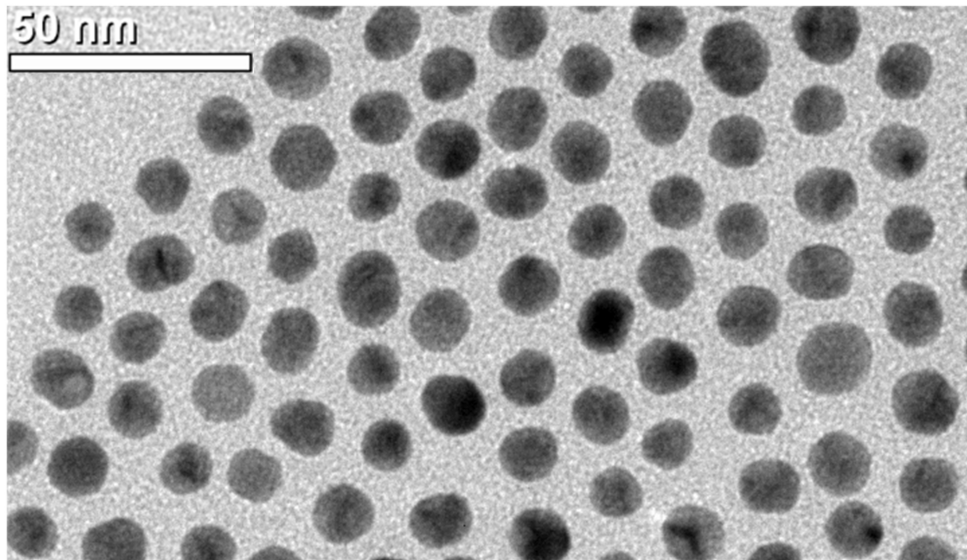

(b)

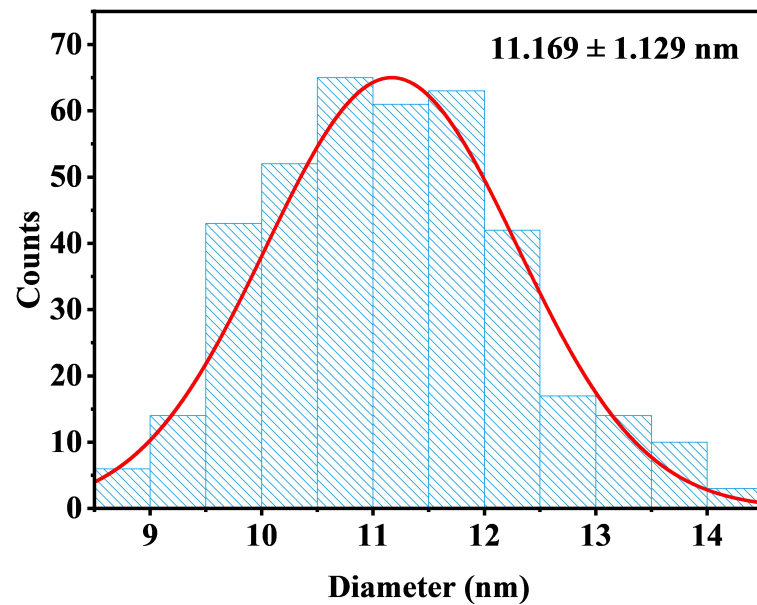

Supplement: d3nr01076g2.pdf [file d3nr01076g2.pdf]

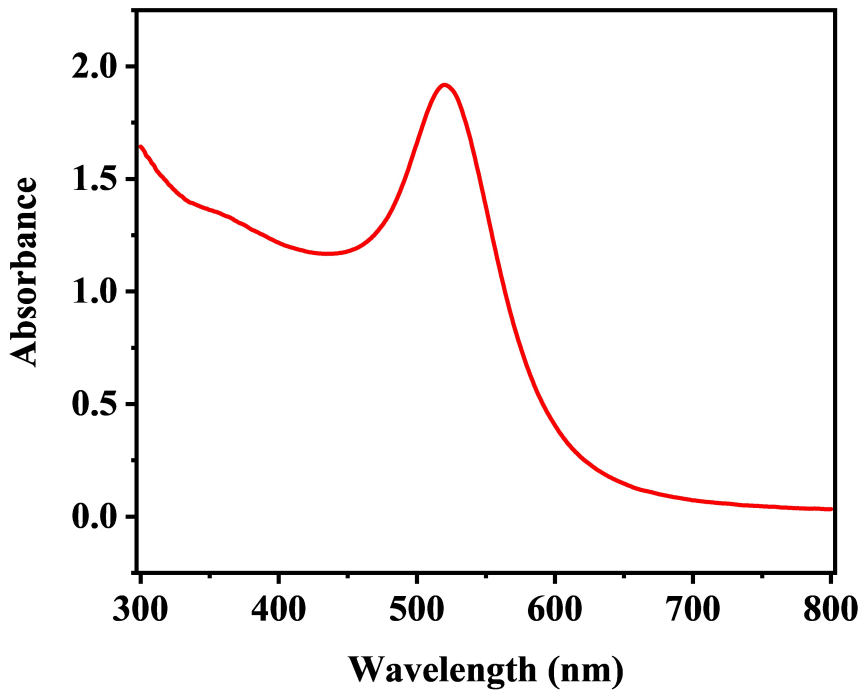

Supplement: d3nr01076g3.pdf [file d3nr01076g3.pdf]

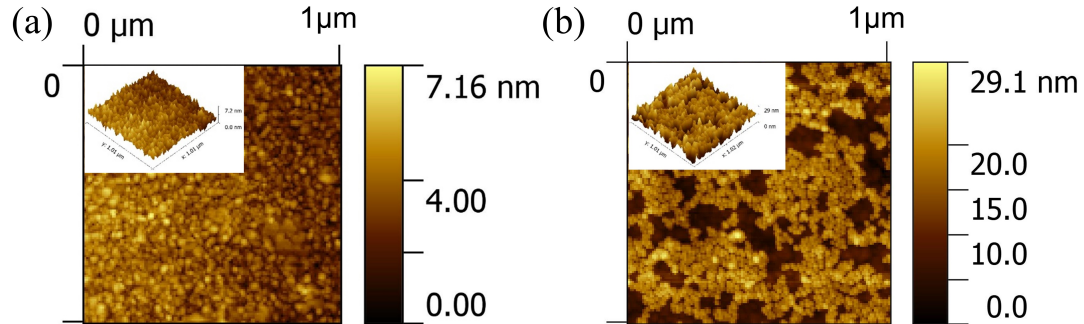

Supplement: d3nr01076g4.pdf [file d3nr01076g4.pdf]

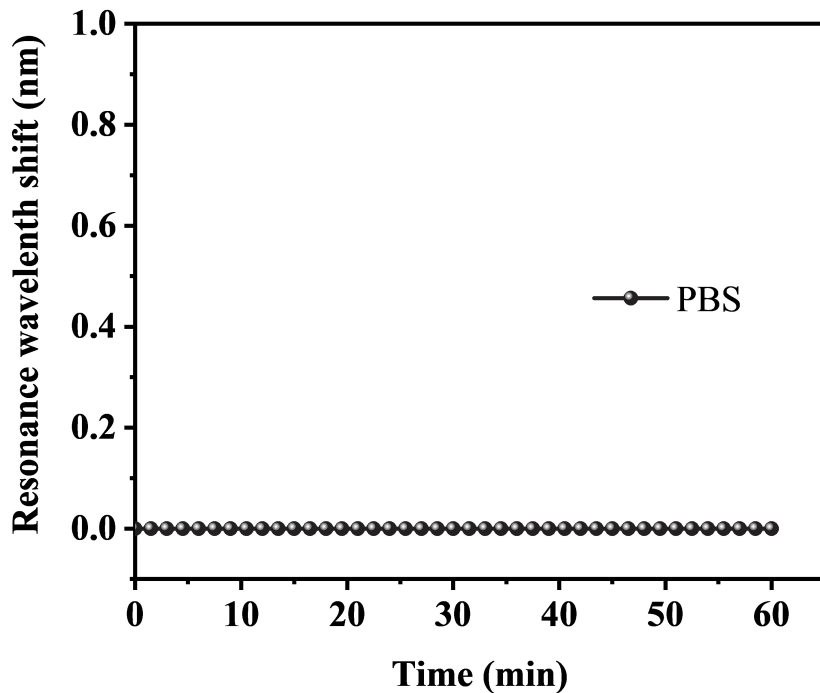

Supplement: d3nr01076g5.pdf [file d3nr01076g5.pdf]
